# Supplementary material for: A mechanistic investigation of low salinity water flooding coupled with ion tuning for enhanced oil recovery
Source: Royal Society of Chemistry journal article supplement (doi:10.1039/d0ra08301a), 2020-01-01
Supplement: d0ra08301a1.pdf [file d0ra08301a1.pdf]

## **Electronic Supporting Information (ESI)**

**For the article:**

**A Mechanistic Investigation of Low Salinity Water Flooding  
Coupled with Ion Tuning for Enhanced Oil Recovery**

*Rohit Kumar Saw, Ajay Mandal \**

Chemical Flooding Laboratory, Department of Petroleum Engineering  
Indian Institute of Technology (Indian School of Mines), Dhanbad -  
826004, India

\*Corresponding Author, Email: [ajay@iitism.ac.in](mailto:ajay@iitism.ac.in)

**Table S1:** Physical parameters of crude oil

|                                    |        |
|------------------------------------|--------|
| API @15°C                          | 23.40  |
| Density (g/cm <sup>3</sup> ) @60°C | 0.8849 |
| Acid number (mg KOH/g)             | 0.6    |
| Saturates (%)                      | 52.9   |
| Aromatics (%)                      | 29.5   |
| Asphaltenes (%)                    | 7.8    |
| Resins (%)                         | 9.7    |
| Viscosity (cp)                     | 5.1    |

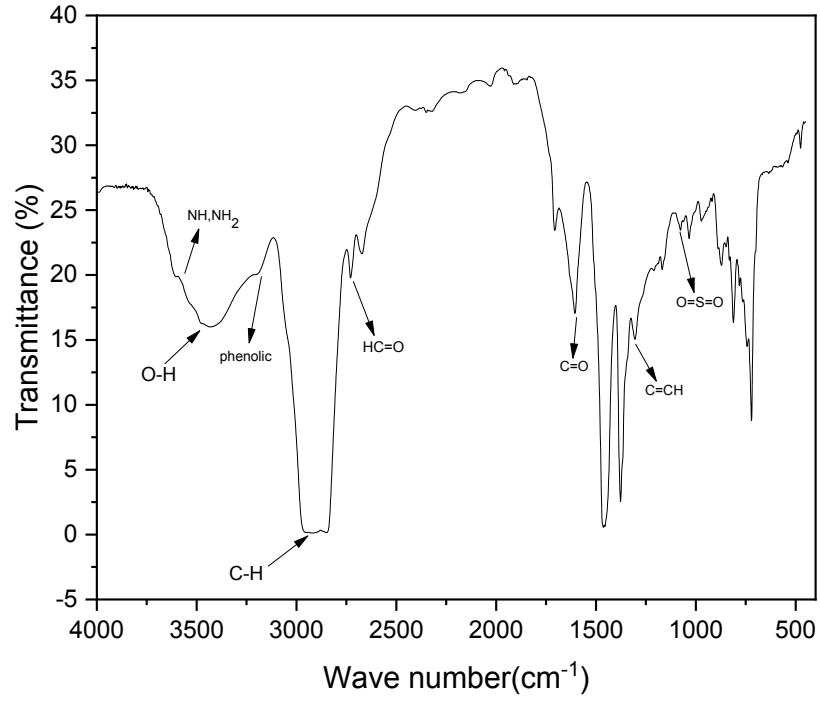

**Fig. S1.** FTIR Characteristics of Crude Oil used in this study

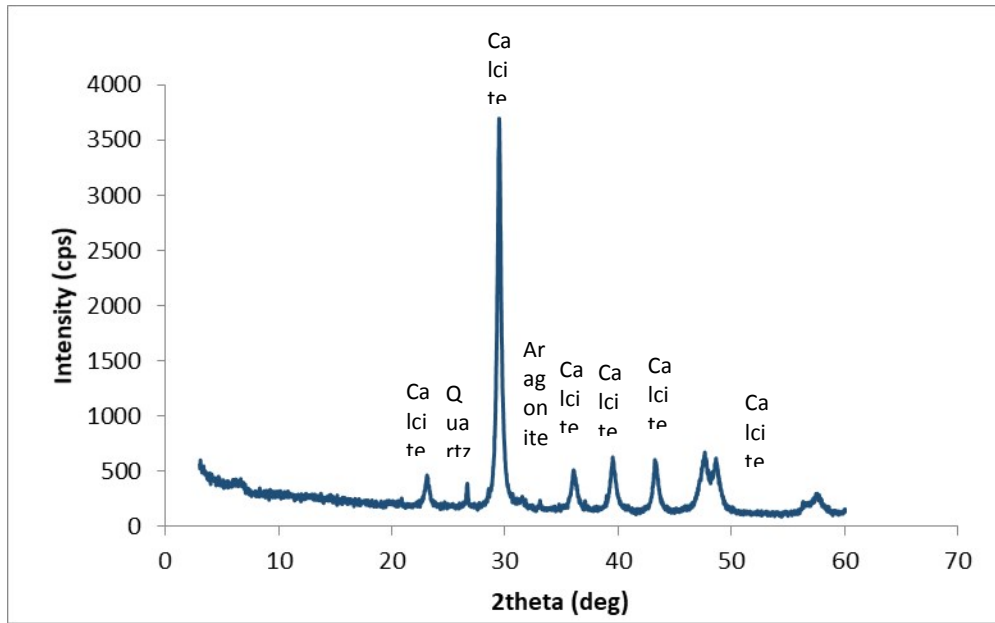

**Fig. S2.** XRD of carbonate rock



**Table S4 - Petrophysical properties of cores**

| Core Number | Length (cm) | Dia (cm) | Porosity (vol %) | Brine Permeability (md) | Connate Water Saturation (%) |
|-------------|-------------|----------|------------------|-------------------------|------------------------------|
| 1.          | 7.5         | 3.84     | 16.20            | 1.32                    | 25.30                        |
| 2.          | 7.5         | 3.84     | 15.83            | 1.87                    | 18.69                        |
| 3.          | 7.5         | 3.84     | 16.80            | 1.55                    | 20.03                        |
| 4.          | 7.5         | 3.84     | 16.43            | 1.52                    | 24.83                        |
| 5.          | 7.5         | 3.84     | 16.01            | 1.48                    | 21.46                        |

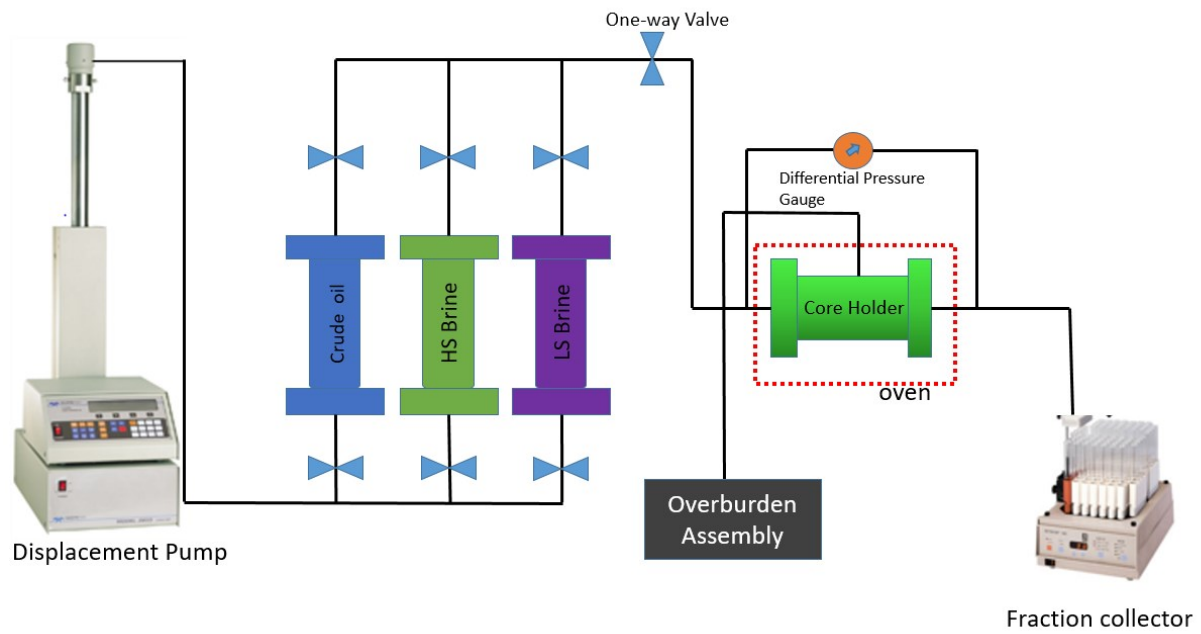

**Fig. S3.** Core Flooding Setup

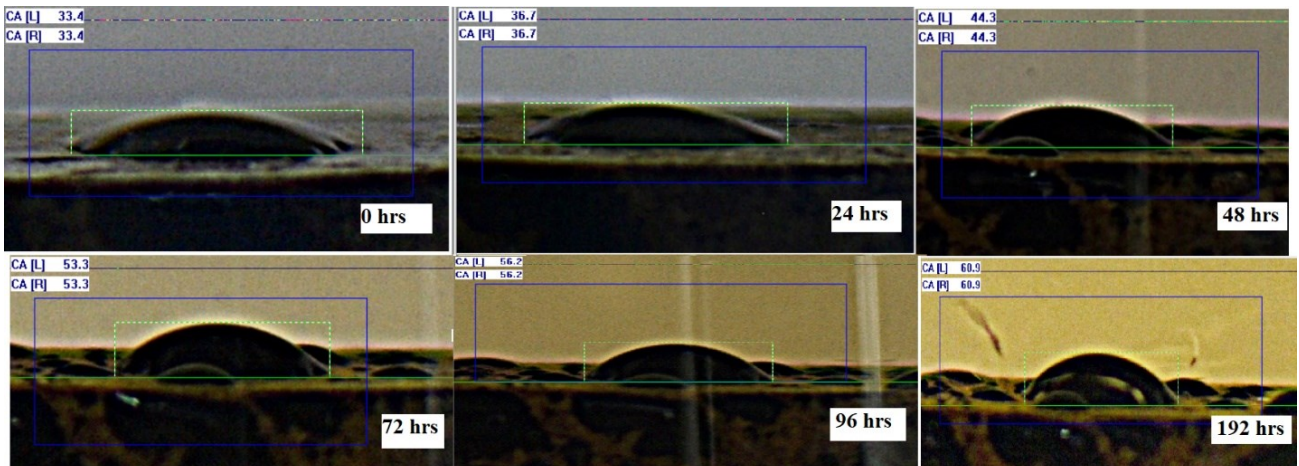

**Fig. S4.** Time variant contact angle of 20dSW (optimum salinity) at 90°C
